# Supplementary material
Source: PubMed Central journal article supplement (PMC9827551)
Supplement: EMBR-24-e55387-s004.pdf [file EMBR-24-e55387-s004.pdf]

## **Table of Content:**

- Appendix Fig S1: Quantification and statistical evaluation for biochemical data in Fig 1.....1
- Appendix Fig S2: Quantification and statistical evaluation for biochemical data in Fig 4.....2
- Appendix Fig S3: Quantification and statistical evaluation for biochemical data in Fig 5.....3
- Appendix Fig S4: Quantification and statistical evaluation for biochemical data in Fig 6.....4
- Appendix Fig S5: Quantification and statistical evaluation for biochemical data in Fig 7.....5
- Appendix Fig S6: Quantification and statistical evaluation for biochemical data in Fig 8.....6
- Appendix Fig S7: Quantification and statistical evaluation for biochemical data in Fig EV4.....7
- Appendix Fig S8: Quantification and statistical evaluation for biochemical data in Fig EV5.....8

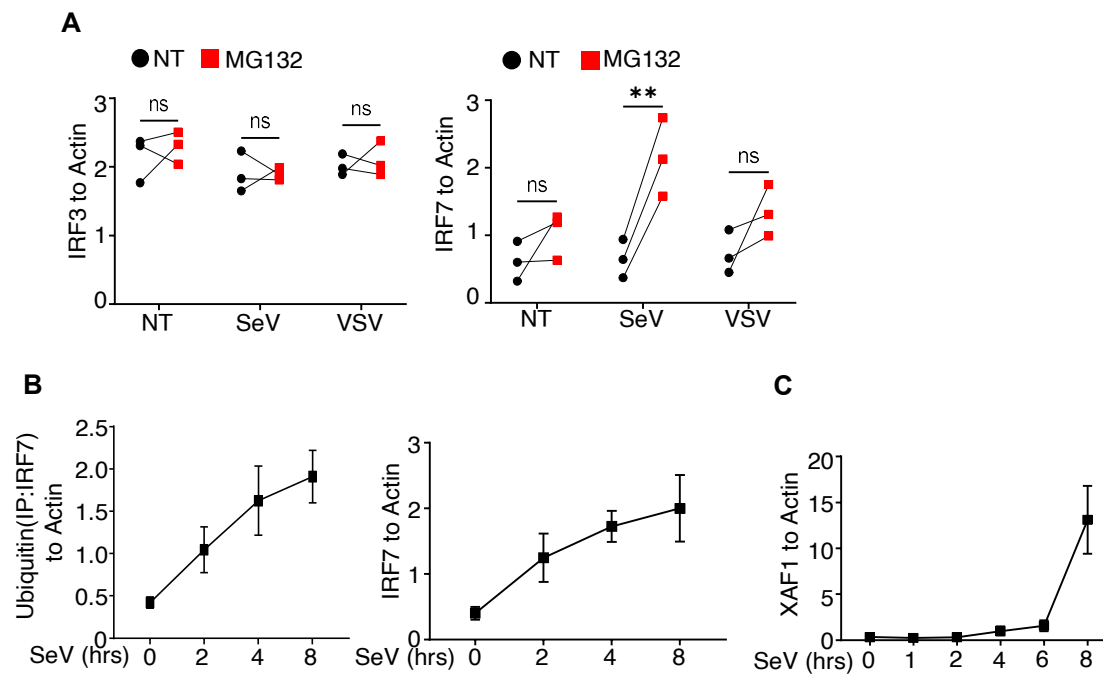

**Appendix Fig S1: Quantification and statistical evaluation for biochemical data in Fig 1.**

(A) The quantification of IRF3 (left) and IRF7 (right) levels across three experiments. A representative Western blot is shown in Fig 1C.

(B) The quantification of the ubiquitination levels of IRF7 (left) and IRF7 levels (right) across three experiments. A representative Western blot is shown in Fig 1D.

(C) The quantification of XAF1 levels across three experiments. A representative Western blot is shown in Fig 1E.

Data information:

- Data are mean $\pm$ SEM (n=3 biologically independent repeats).
- Two-way ANOVA Multipul comparisons. ns, no significant difference; \*p < 0.05; \*\*p < 0.01; \*\*\*p < 0.001.

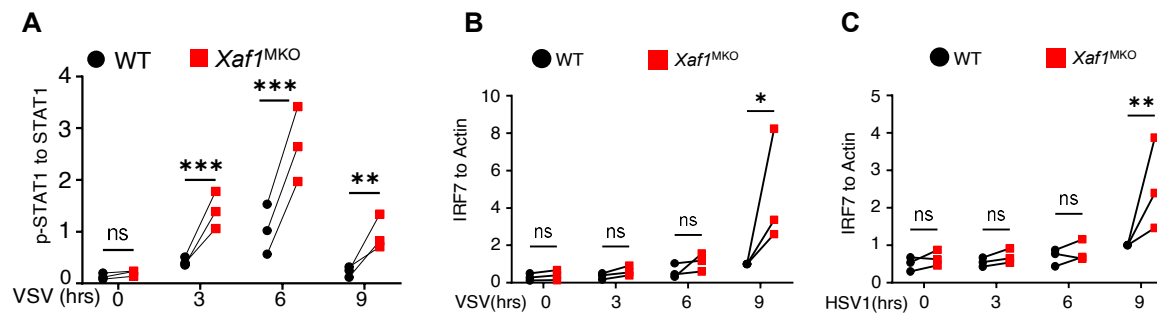

**Appendix Fig S2: Quantification and statistical evaluation for biochemical data in Fig 4.**

(A) The quantification of p-STAT1 levels across three experiments. A representative Western blot is shown in Fig 4E.

(B) The quantification of IRF7 levels across three experiments. A representative Western blot is shown in Fig 4H.

(C) The quantification of IRF7 levels across three experiments. A representative Western blot is shown in Fig 4I.

Data information:

- Data are representative of 3 biologically independent repeats.
- Two-way ANOVA Multipul comparisons. ns, no significant difference; \* $p < 0.05$ ; \*\* $p < 0.01$ ; \*\*\* $p < 0.001$ .

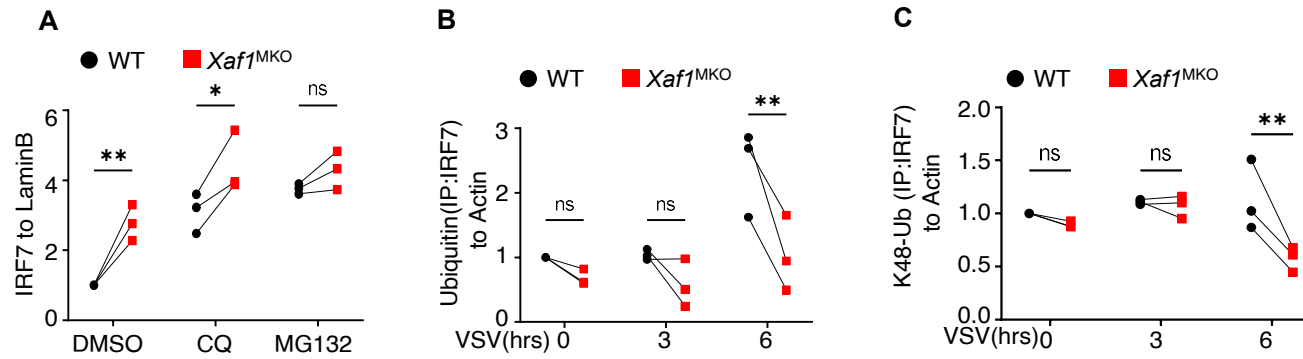

**Appendix Fig S3: Quantification and statistical evaluation for biochemical data in Fig 5.**

(A) The quantification of IRF7 levels across three experiments. A representative Western blot is shown in Fig 5A.

(B) The quantification of the ubiquitination levels of IRF7 across three experiments. A representative Western blot is shown in Fig 5B.

(C) The quantification of the K48-linked ubiquitination levels of IRF7 across three experiments. A representative Western blot is shown in Fig 5C.

Data information:

- Data are representative of 3 biologically independent repeats.
- Two-way ANOVA Multipul comparisons. ns, no significant difference; \* $p < 0.05$ ; \*\* $p < 0.01$ ; \*\*\* $p < 0.001$ .

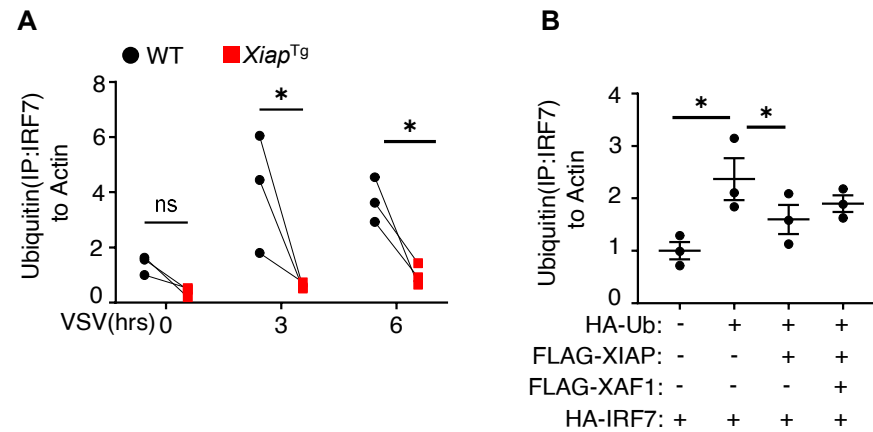

**Appendix Fig S4: Quantification and statistical evaluation for biochemical data in Fig 6.**

(A) The quantification of the ubiquitination levels of IRF7 across three experiments. A representative Western blot is shown in Fig 6H.

(B) The quantification of the ubiquitination levels of IRF7 across three experiments. A representative Western blot is shown in Fig 6I.

Data information:

- Data are mean±SEM (n=3 biologically independent repeats).
- Two-way ANOVA Multipul comparisons(A), Ordinary one-way ANOVA Multipul comparisons(B). ns, no significant difference; \*p < 0.05; \*\*p < 0.01; \*\*\*p < 0.001.



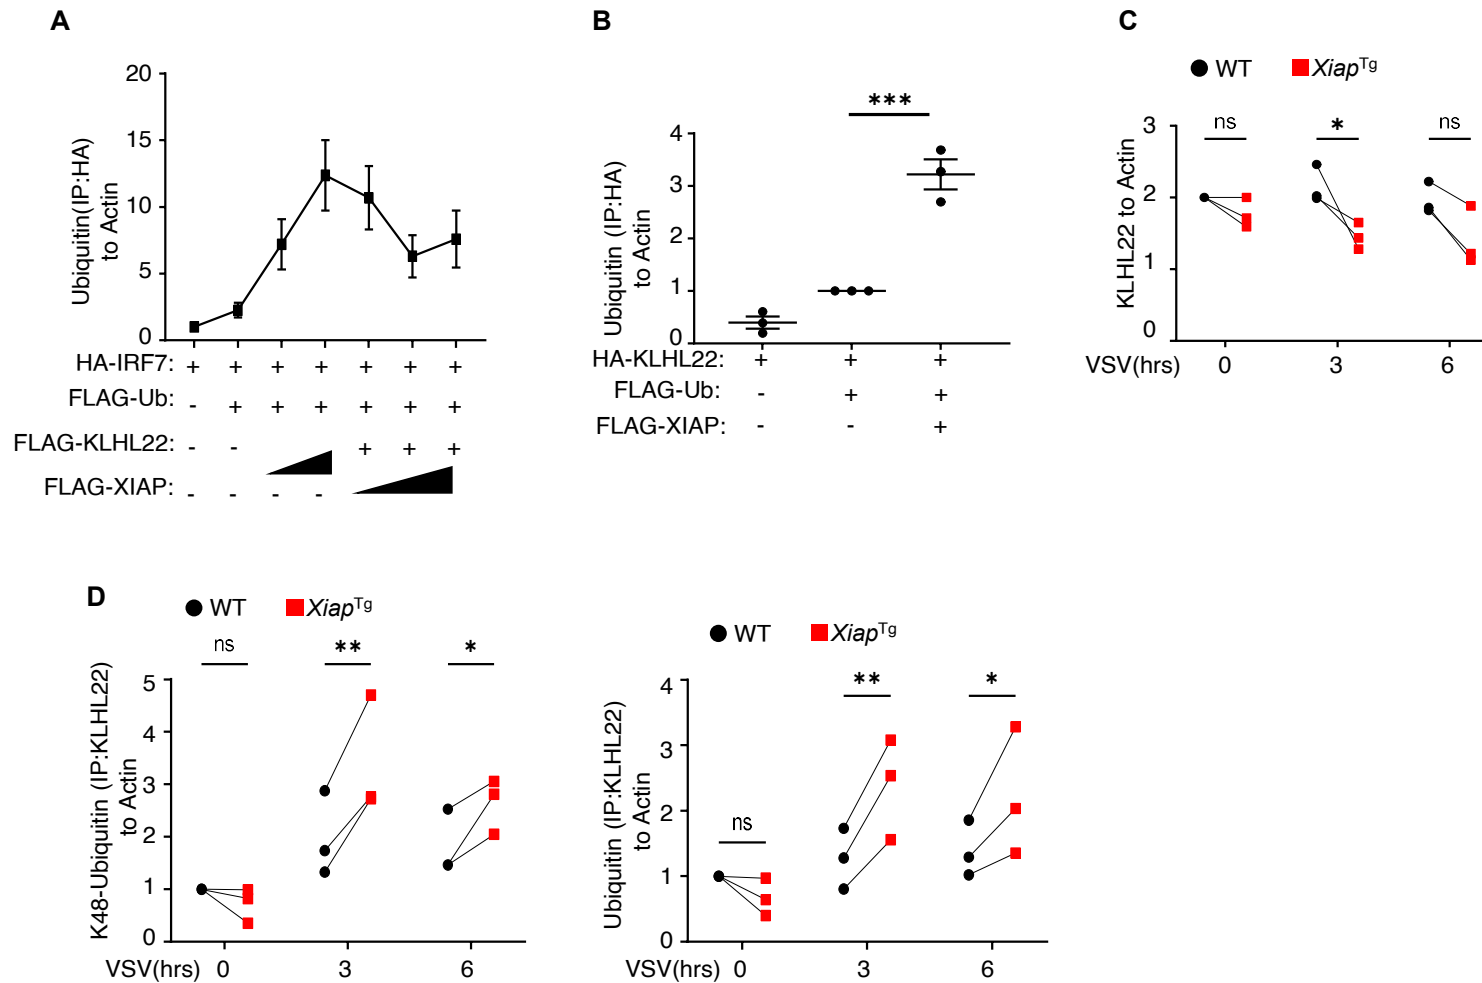

**Appendix Fig S6: Quantification and statistical evaluation for biochemical data in Fig 8.**

(A) The quantification of the ubiquitination levels of IRF7 across three experiments. A representative Western blot is shown in Fig 8A.

(B) The quantification of the ubiquitination levels of KLHL22 across three experiments. A representative Western blot is shown in Fig 8B.

(C) The quantification of KLHL22 levels across three experiments. A representative Western blot is shown in Fig 8C.

(D) The quantification of the K48-linked ubiquitination levels (left) and the ubiquitination levels (right) of KLHL22 across three experiments.

A representative Western blot is shown in Fig 8D.

Data information:

- Data are mean±SEM (n=3 biologically independent repeats).

- Ordinary one-way ANOVA Multipul comparisons(A-B), Two-way ANOVA Multipul comparisons(C-E). ns, no significant difference; \*p < 0.05; \*\*p < 0.01; \*\*\*p < 0.001.





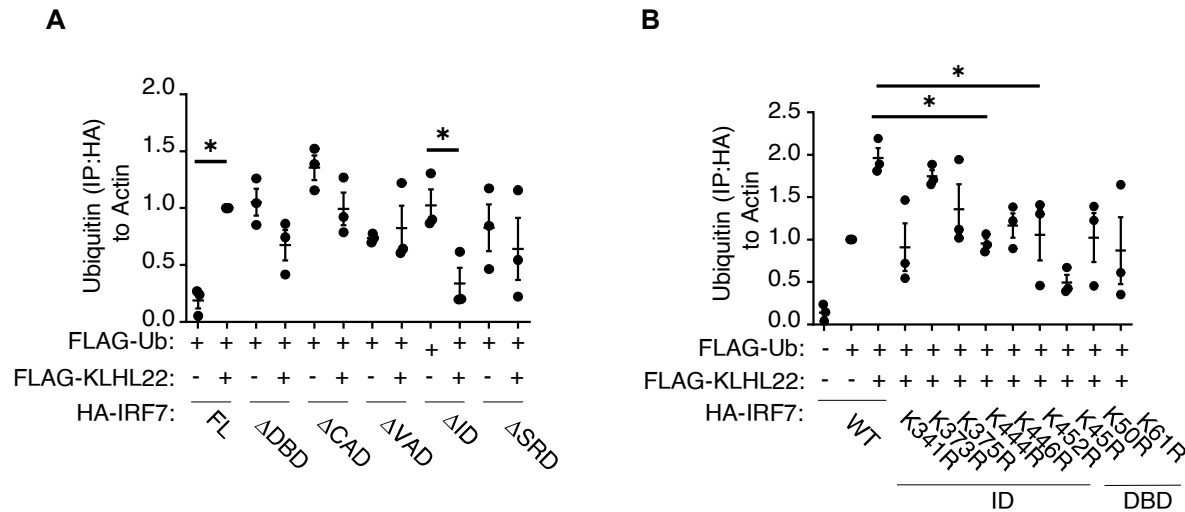

**Appendix Fig S8: Quantification and statistical evaluation for biochemical data in Fig EV5.**

(A) The quantification of the ubiquitination levels of IRF7 across three experiments. A representative Western blot is shown in Fig EV5D.

(B) The quantification of the ubiquitination levels of IRF7 across three experiments. A representative Western blot is shown in Fig EV5E.

Data information:

- Data are mean±SEM (n=3 biologically independent repeats).
- Ordinary one-way ANOVA Multipul comparisons(A-B). ns, no significant difference; \*p < 0.05; \*\*p < 0.01; \*\*\*p < 0.001.
