# Supplementary material
Source: PubMed Central journal article supplement (PMC9827551)

Figure 8A

FLAG-XIAP: - - - - **▲**  
 FLAG-KLHL22: - - **▲** + + +  
 FLAG-Ub: - + + + + + +  
 HA-IRF7: + + + + + + +

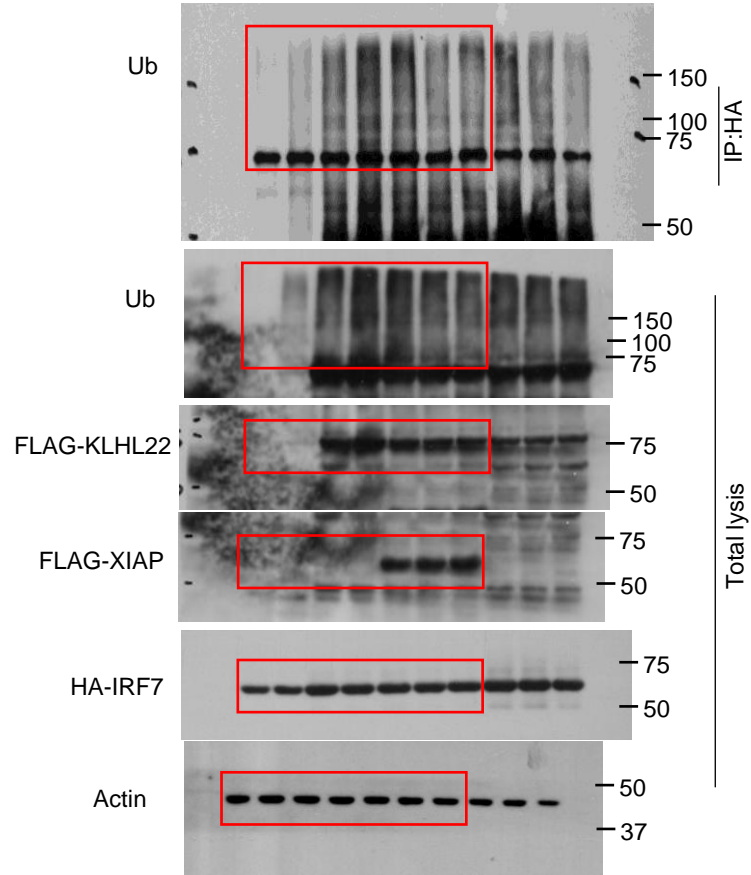

Figure 8B

FLAG-XIAP: - - +  
 FLAG-Ub: - + +  
 HA-KLHL22: + + +

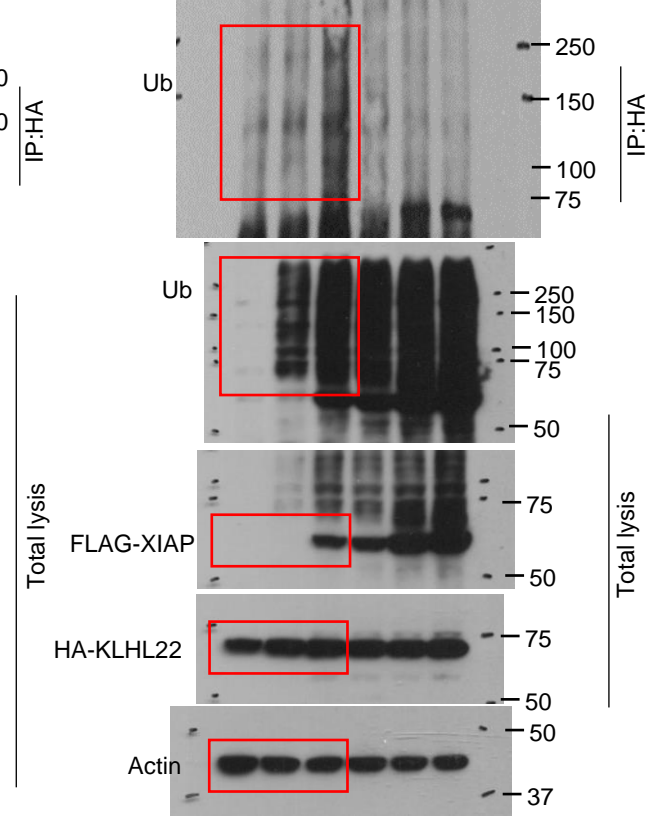

Figure 8C

WT *Xiap<sup>Tg</sup>*  
 VSV (hrs) 0 3 6 0 3 6

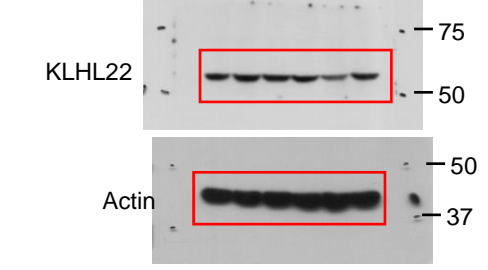

Figure 8D

WT *Xiap<sup>Tg</sup>*  
 VSV (hrs) 0 3 6 0 3 6  
 MG132 + + + + + +

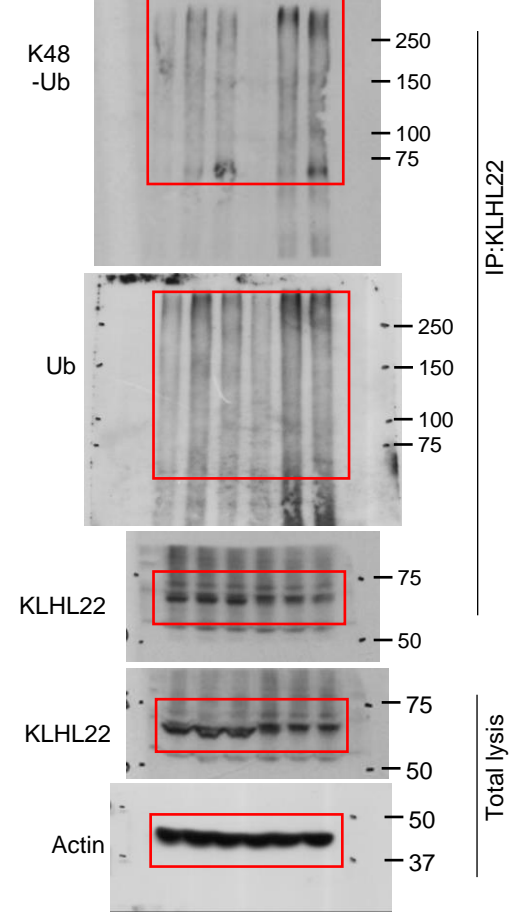

Figure 8E

*Klh22<sup>H/+</sup>* *Klh22<sup>-/-</sup>* *Klh22<sup>H/+</sup>; Xiap<sup>OE</sup>* *Klh22<sup>-/-</sup>; Xiap<sup>OE</sup>*

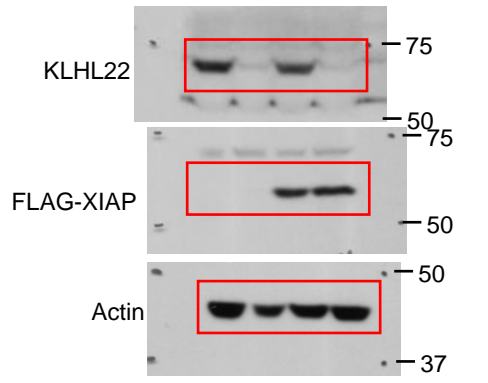

Supplement: EMBR-24-e55387-s009.pdf [file EMBR-24-e55387-s009.pdf]
