# Supplementary material
Source: PubMed Central journal article supplement (PMC9827551)

- Blots, as shown below, were cut into slices before incubation with primary antibodies.
- Protein ladder used in this study was abotained from Bio-Rad (161-0374).

Figure 1C

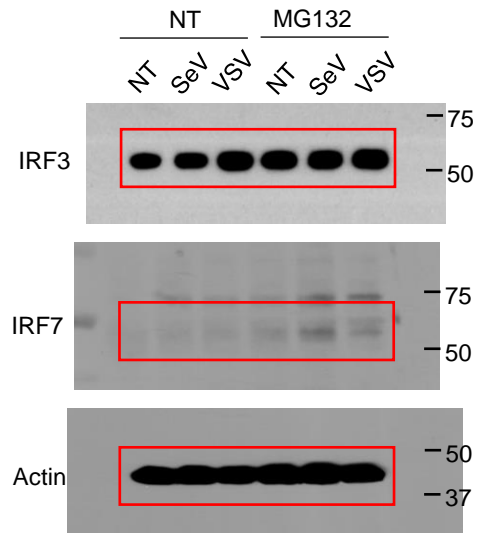

Figure 1D

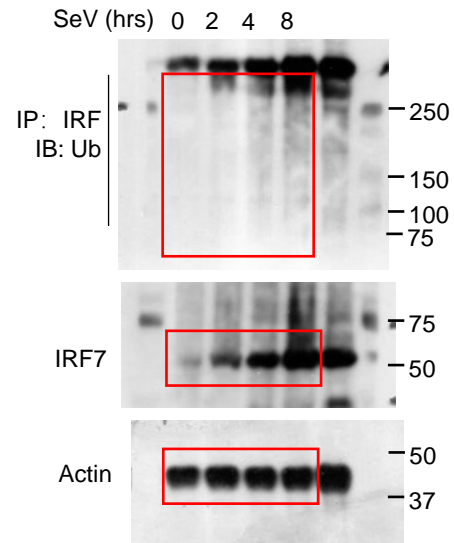

Figure 1I

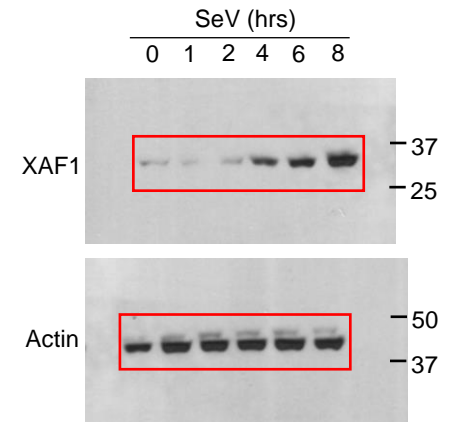

Supplement: EMBR-24-e55387-s011.pdf [file EMBR-24-e55387-s011.pdf]
