# Supplementary material
Source: PubMed Central journal article supplement (PMC9827551)

Figure 6F

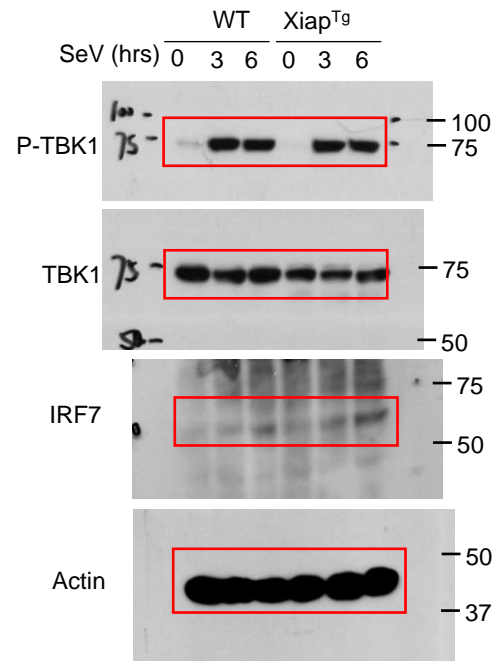

Figure 6G

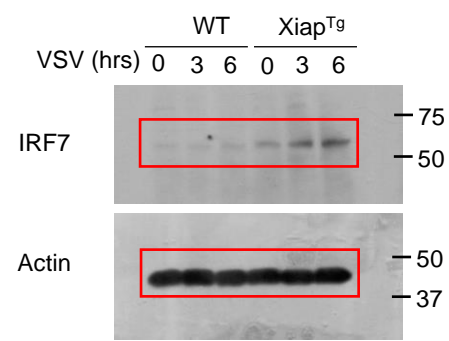

Figure 6H

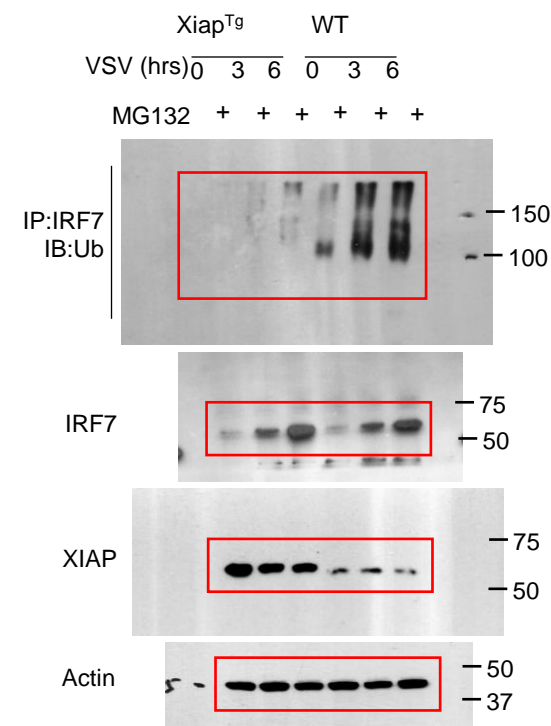

Figure 6I

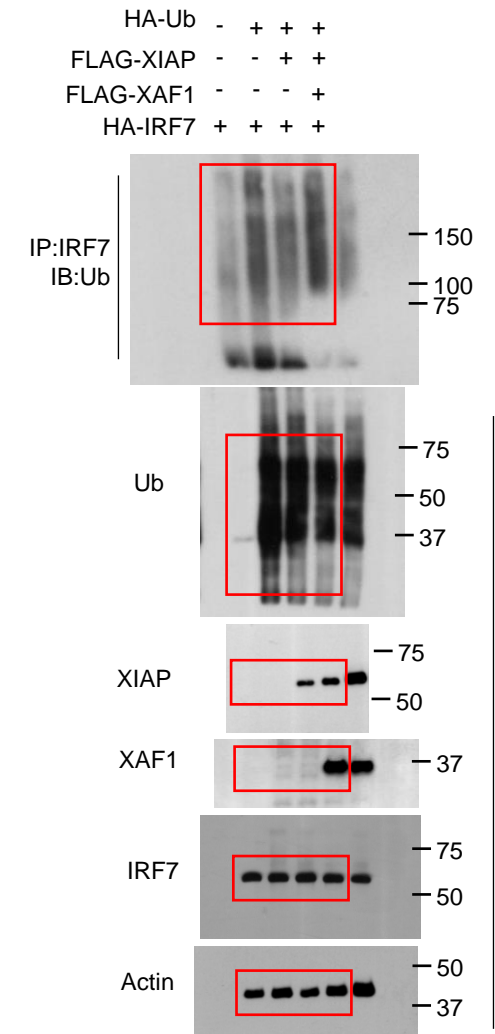

Figure 6J

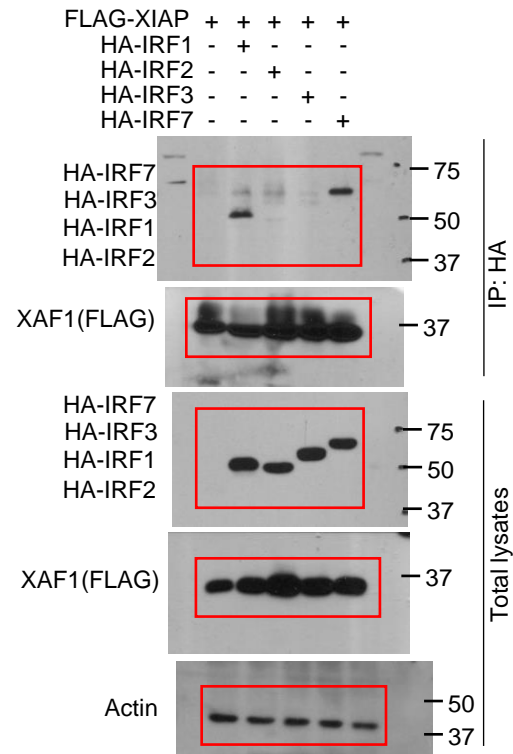

Figure 6K

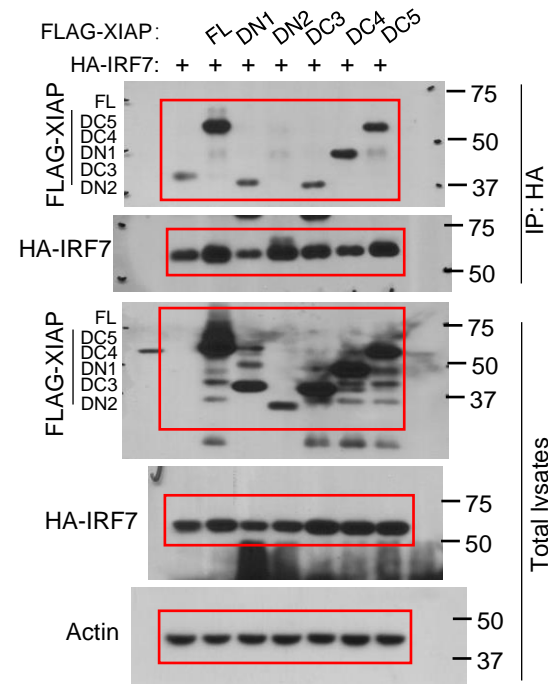

Supplement: EMBR-24-e55387-s001.pdf [file EMBR-24-e55387-s001.pdf]

Figure 5A

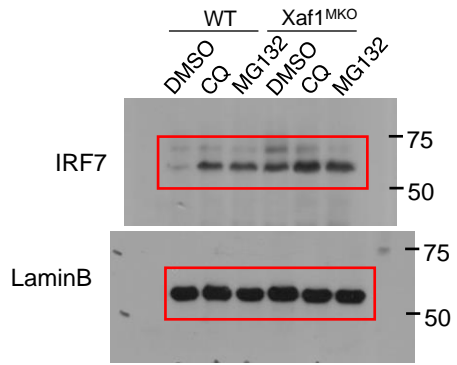

Figure 5B

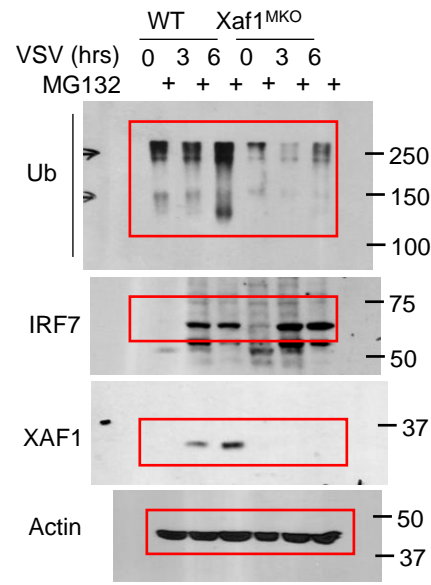

Figure 5C

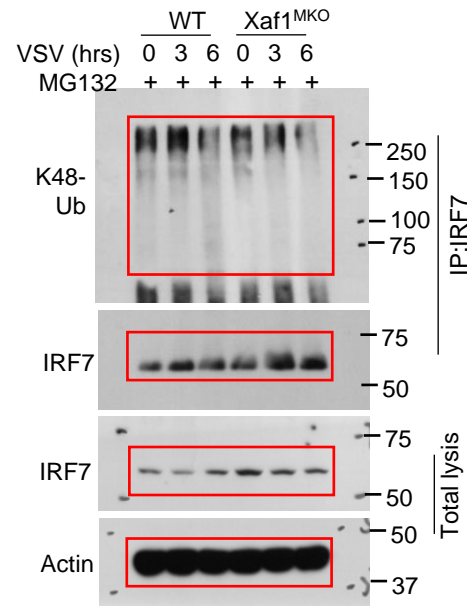

Figure 5D

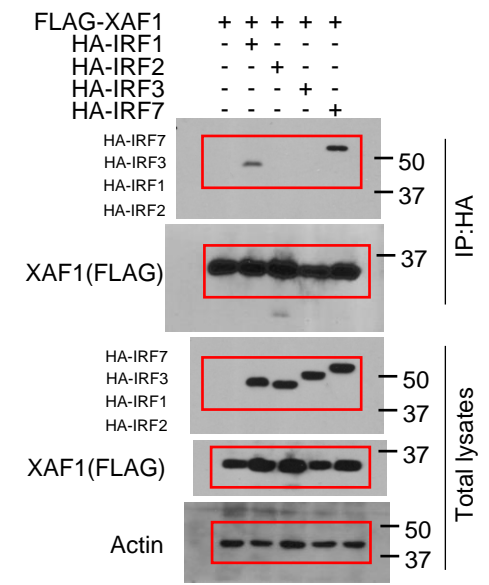

Figure 5E

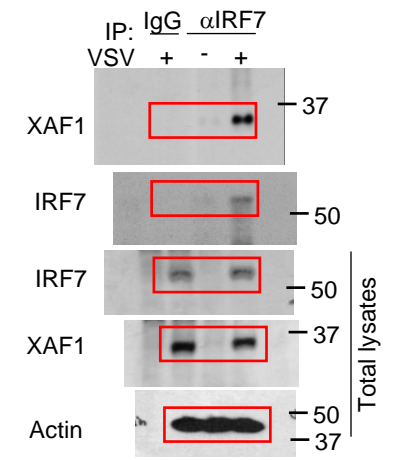

Figure 5F

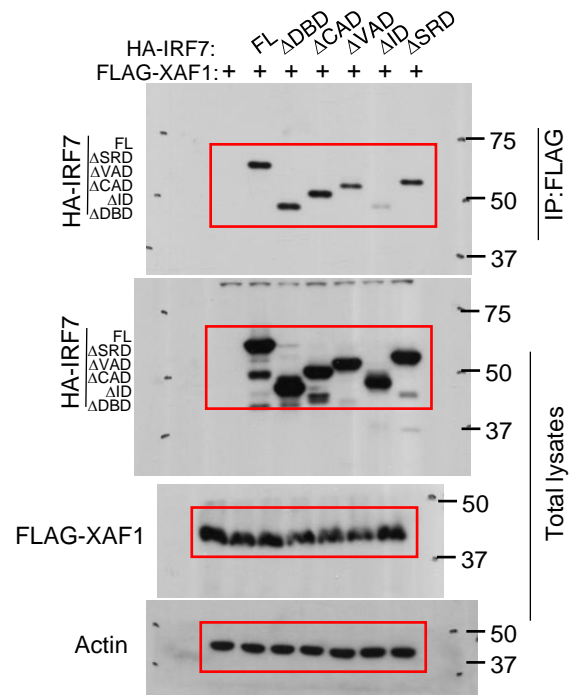

Figure 5G

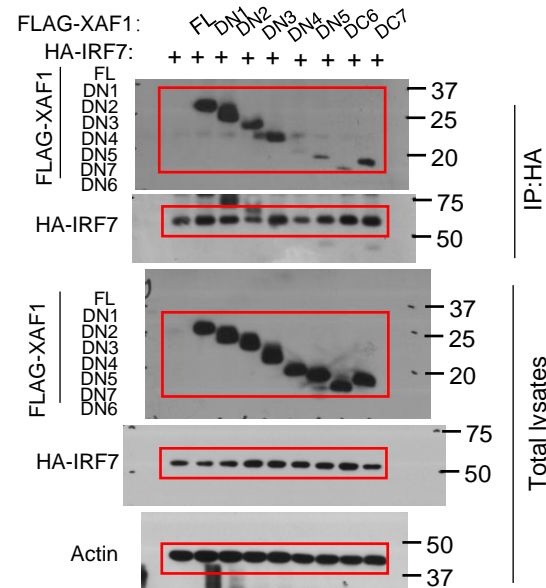

Figure 5H

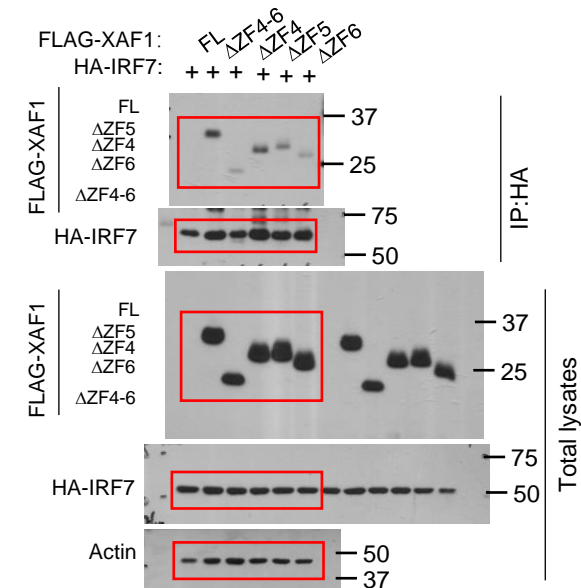

Supplement: EMBR-24-e55387-s012.pdf [file EMBR-24-e55387-s012.pdf]

Figure 7B

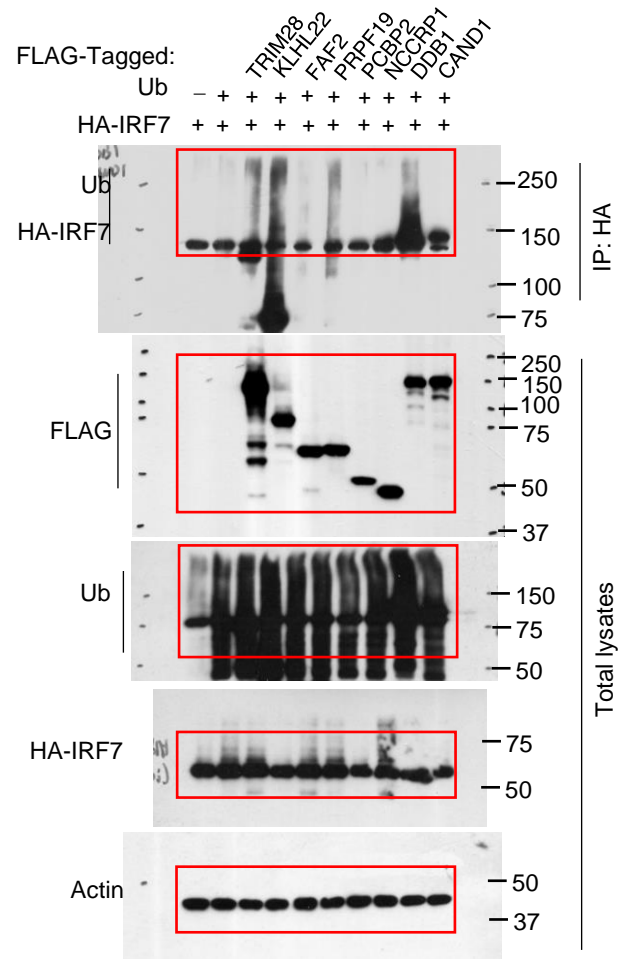

Figure 7F

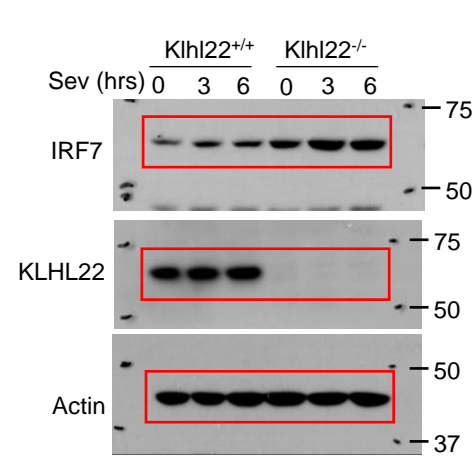

Figure 7G

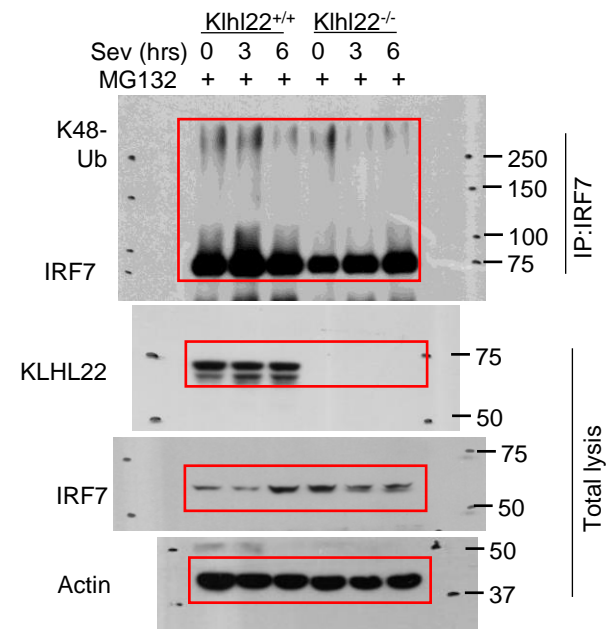

Figure 7H

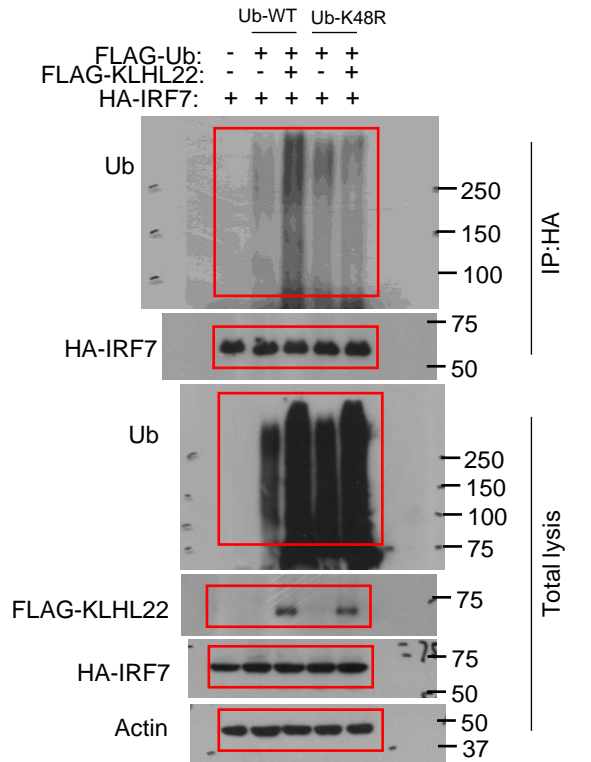

Figure 7I

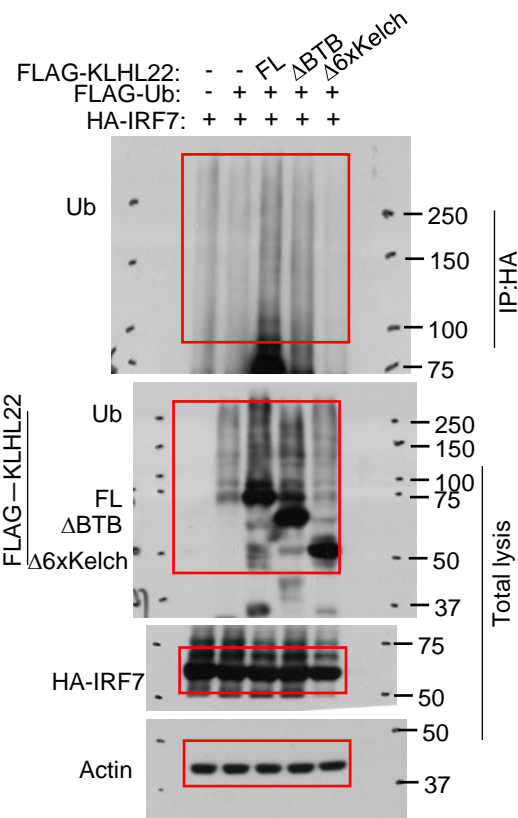

Figure 7J

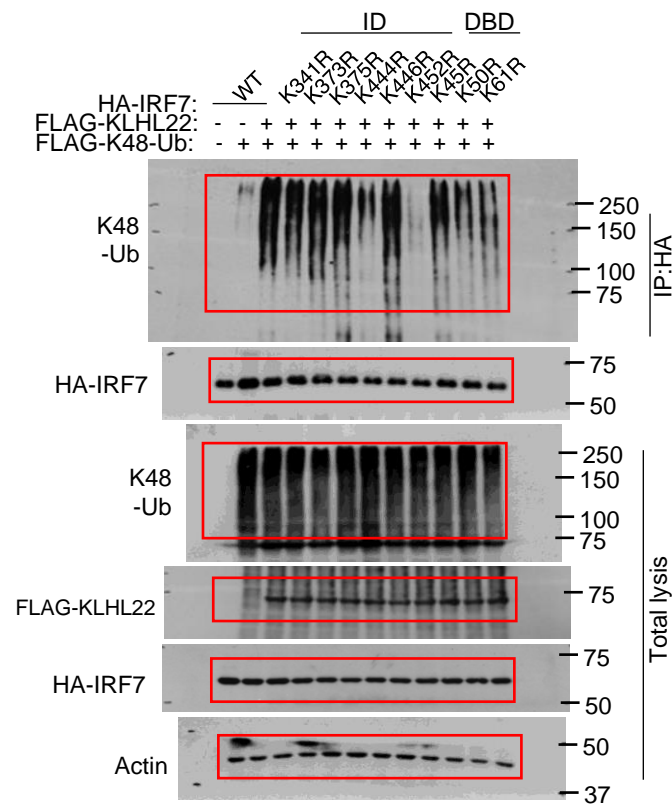

Supplement: EMBR-24-e55387-s013.pdf [file EMBR-24-e55387-s013.pdf]
